# Supplementary material for: Single-step fabrication of ZnO microflower thin films for highly efficient and reusable photocatalytic activity
Source: Springer Nature journal article supplement (doi:10.1007/s10854-020-03914-6), 2020-07-12
Supplement: MOESM1 [file 10854_2020_3914_MOESM1_ESM.docx]

**Single Step Fabrication of ZnO Microflower Thin Films for Highly Efficient and Reusable Photocatalytic Activity**

Monoj Kumar Singha*1, Aniket Patra 2, Vineet Rojwal 1, and Deepa KG 3,

1Instrumentation and Applied Physics, Indian Institute of Science, Bangalore 560012
2Electrical and Communication Engineering, Indian Institute of Science, Bangalore 560012
3Department of Physics, University of Kerala, Thiruvananthapuram, Kerala 695581

*Corresponding Author: monojsingha@yahoo.co.in, monojsingha@iisc.ac.in

***Fig S1.*** *Texture coefficient of varied molarity (0.05 M, 0.1 M and 0.15 M ) of precursor for ZnO thin films with three major planes (inset: the ratio of texture coefficient with molarity)*

***Fig S2.*** *Bandgap measurement with varied molarity of precursor for ZnO thin films (a) 0.05 M, (b)0.1 M and (c) 0.15 M*


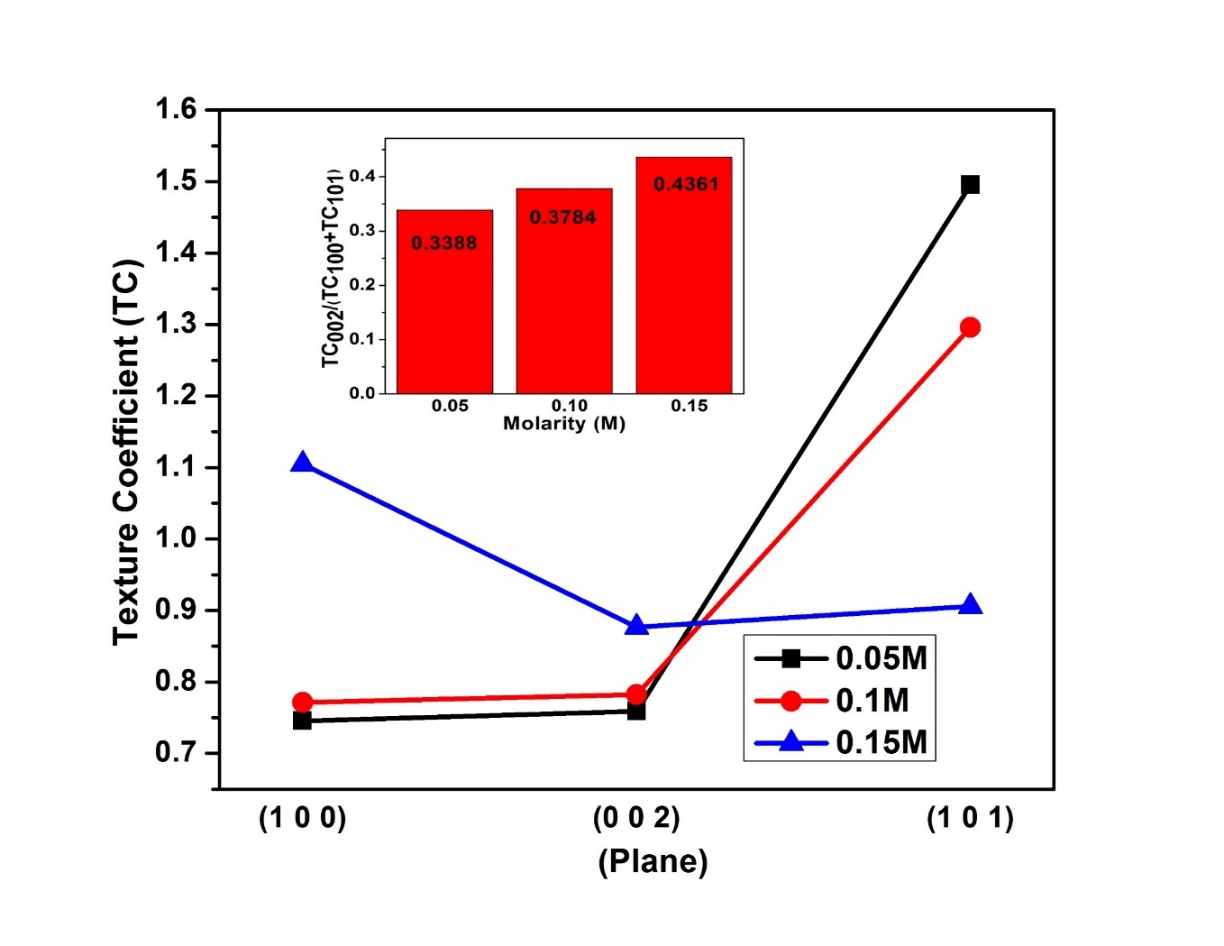


***Fig S1.***


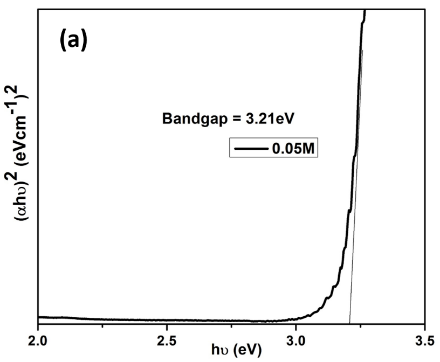

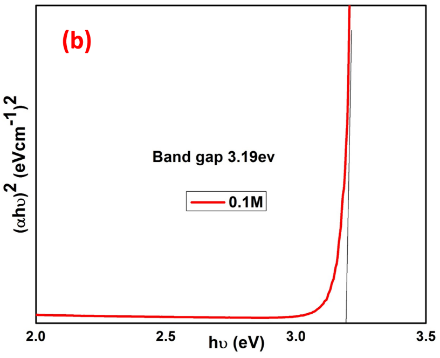


***Fig S2. (a) Fig S2. (b)***


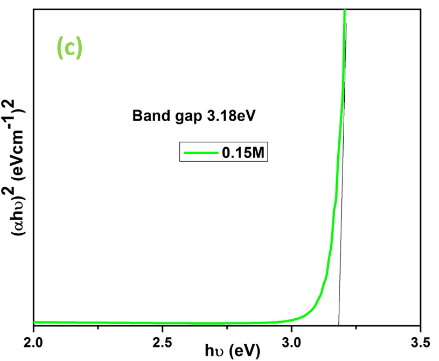


***Fig S2. (c)***
